# Supplementary material for: A formative study exploring perceptions of physical activity and physical activity monitoring among children and young people with cystic fibrosis and health care professionals
Source: Springer Nature journal article supplement (doi:10.1186/s12887-018-1301-x), 2018-10-23
Supplement: MOESM4 [file 16220444]

# CF Expert Meeting

1 P1 OK, so as you all know, my name's P1, and we're here to talk about the ideas that have been  
2 brought forward from the findings of the CF study. So if you'd each like to take a moment  
3 just to introduce yourselves. Maybe we'll start with you, P2.

4 P2 OK, so I'm P2. I'm here, although it says in terms of a qualitative research expert, I'd also like  
5 to offer some comment as a psychologist as well into the discussion, by nature of the results  
6 that have come out.

7 P3 I'm P3. I'm the clinical specialist physiotherapist working with the CF team, and involved a lot  
8 in looking at exercise with our CF patients.

9 P4 I'm P4. My capacity today is the physical activity expert, with a particular interest in children  
10 and young people and the measurement of physical activity.

11 P5 I'm P5. I'm a paediatric doctor, and I look after children and young people with cystic fibrosis.

12 P1 OK, thank you very much. So perhaps if we go back round in the same order, start off with  
13 P2. You've got your ideas.

14 P2 Right. OK, so as I say, I've looked at this from two perspectives really, from a qualitative  
15 methodology point of view, which is how the study in its entirety manifested, and also as a  
16 psychologist. Key points for me, to summarise in terms of research moving forward, is that I  
17 felt there was significant value to the fact that this study was by design a formative study,  
18 and that the outcomes would inform further studies, whether it be intervention or large  
19 scale studies. There was a limited recruitment, so in terms of being able to make statements  
20 around consensus from the group of patients, that was hindered by low levels of  
21 recruitment, but what we have got is rich in- depth information about individual experiences  
22 of the children and young people, so that is a strength. In employing both survey and  
23 interview methods, we're within the realms of method triangulation, so again in terms of  
24 confidence within the data, the opportunity for children and young people to complete the  
25 survey and then the interview happen subsequently afterwards to put some more detail on  
26 those responses adds confidence to the methods and the data, and also the role of parents.  
27 So in some of the interviews the parents were present and acknowledged, though they don't  
28 feature within the data set. That was, again from a confidence point of view for the parents  
29 and their consent, and my perception is that that provided good compliance and  
30 engagement, and we dealt with the data efficiently by way of what was offered by the  
31 parents, and almost cleaned the data to make sure it didn't contaminate the children and  
32 young people's responses. From a psychologist's point of view, I feel there is scope to look at,  
33 for any future interventions, some scope around looking at how the children and young  
34 people interpret negative symptoms of activity, and that some intervention by a specialist  
35 could be useful to support that. I also think that the devices that they used, that there  
36 seemed to be some feedback from the children and young people around the immediacy,  
37 the interactive nature, and also the individual nature of the responses, almost to the point  
38 where we might look at choice, if you're going to use these devices in the future that there  
39 could be a menu. And my last one now, sorry, and again, reiterating the point from the  
40 qualitative research about the role of others, whether it be the CF team or the parent, and

## CF Expert Meeting

41 the sort of training and intervention work. There needs to be sort of a team approach, rather  
42 than typically we might look at interventions to target children and young people, and that  
43 for me is different to other paediatric interventions that we've done before.

44 P1 OK, thank you, P2. Would you like to go next, P3?

45 P3 Yes. I've just got some comments about the different points of the certain phases, and some  
46 of the way the subjects perceive themselves as being highly active. Again, I'd like to know a  
47 little more kind of how that maybe compares to reality. How did they define their own level  
48 of activity? Did they count how many football sessions they had a week, or was it organised  
49 activity or self-monitored things like that, and what was their expectation of themselves? Did  
50 they fulfil what they thought, or did they fall short? In point number four, you mentioned  
51 the unpleasant symptoms, and about breathlessness hinders capacity. This is interesting,  
52 and it kind of makes me wonder whether our children and adolescents identify  
53 breathlessness as part of having CF, as opposed to being normal, as a normal part related to  
54 exercise, and that shows me that some didn't cope very well with the feeling of being short  
55 of breath. Another interesting one was they perceive themselves as less able to do the same  
56 level of activity as their peers, and this is a bit disappointing to me because we do a lot of  
57 education and activity, and we promote it from diagnosis. So we personally would have a  
58 high expectation they'd have good excellent lung function, and therefore should have little  
59 impact on their ability to exercise. So I just wonder is that perception real to them, or is it  
60 something they learn, or is it an approach that they develop as having been given the  
61 diagnosis, and again, do they challenge themselves less maybe, or have lower expectations  
62 than others? And again, it kind of tells me that we need a better model of self-perception  
63 and education. Again, looking at the similarity between the parents and the participants,  
64 again, thinking back to that point six, is it, something that the parents' anxiety is projected  
65 onto the child. Again, looking at the results, we didn't relate anything back to age, and we  
66 had looked at primary and secondary age group, and is there anything we can pull out from  
67 that aspect. So, just to finish, in choosing the device, I think, like, P2 said, I think patient  
68 choice is a really important factor. They like the feedback, they like to see their results  
69 instant, preferably. The comfort of the device was obviously important to them, and in some  
70 cases it being discreet, although maybe trendy might be a more...A couple of words on the  
71 physio survey. I was just interested to see what people did around the UK, field tests.

72 P2 Yes. OK. Sorry.

73 P1 No, go on. That's fine.

74 P3 Exercise tests were used, field tests were used in the majority, twenty-two out of twenty-six,  
75 and only four used the very specific CPET testing to use VO2 max. So I think best practice  
76 would be as a practical application as opposed to an annual test for individuals, which  
77 highlight concern for us. It would be really useful to support patients after an acute  
78 exacerbational following exercise tolerance test that shows poor deterioration tolerance,  
79 and it would inform us of the patient's actual level of activity, rather than relying on patient  
80 report.

## CF Expert Meeting

81 P4 Where did you get that thing about the CPET testing?

82 P3 It's in the physio survey.

83 P4 Did I miss that?

84 P1 Oh no, that wasn't on there.

85 P2 Yes, you can have a look at those if you want. Those are the physio survey.

86 P4 Did I get those?

87 P2 No.

88 P4 All right. So you're talking about something I haven't seen. That's interesting. I'd like to have  
89 a look at the physio survey.

90 P3 Can I have two more sentences?

91 P1 Yes, of course.

92 P3 I think it's important to let the patient choose after being shown the alternatives. Really  
93 important is to continue ongoing education on the exercise with the patients and the  
94 families, throughout all ages and stages of disease progression, with discussion concerning  
95 expectations of the patient, the family and the therapist, and to reinforce that exercise and  
96 activity as a lifestyle choice rather than prescription, in order to improve compliance.

97 P1 Thank you.

98 P4 OK, well, the teacher in me couldn't resist producing some paper, so if you want to look at  
99 the stuff that I'm going to talk about, I'll shove it on there. You're very welcome to do so, and  
100 I'm going to resist the temptation to pick upon a lot of the things that you've mentioned, P3.  
101 I need to stick to what's on here. So I'm just going to go through each phase. So I guess the  
102 stuff on the first one was the small sample, and the kids describing themselves as being high  
103 active, so we've got to just be conscious of that perhaps there's a degree of kind of selection  
104 bias in the children that we're referring to. Maybe they're not typical. The second point is  
105 about this issue of the CF symptoms being exacerbated during physical activity, which  
106 hinders participants' capabilities to then be active in one of the points down here, and then  
107 there seems to be some normative comparisons with peers. So that kind of got me thinking  
108 a little bit about this thing about perceptions around competencies and self-efficacies, and  
109 some of the psychological backdrop to that. And then the last point there is provisions for  
110 activity to allow kids to socialise and experience relatedness with other kids. So there's some  
111 crossover there, so we've couched the research in this model at the top, promotion model,  
112 and these predisposing factors here are these kind of self-perception-related things which  
113 are very important for activity, and that kind of is borne out a little bit there, and that  
114 INAUDIBLE (11:46) self-determination theory kind of model where being related, or having  
115 relatedness in conceived competencies is an important part of that. So there's some kind of  
116 psych theory which is underpinned a little bit. This next little line diagram is about, well,

## CF Expert Meeting

117 we've got this activity behaviour here which comes out of phase one, and we often think of  
118 activity as having these different domains. There's frequency, intensity, time and type,  
119 intensity being quite important. So there's some links in the results to being active related to  
120 being fitter, and having health and wellbeing, which is a positive outcome. To improve  
121 fitness we need to engage in vigorous physical activity. In the results it then kind of said,  
122 "Well, being fitter mitigates the symptoms of CF, but also says that having the symptoms  
123 hinders the participation of vigorous physical activity. So it's almost a chicken and egg  
124 scenario there, the way I kind of read that, and it'd be interesting to see thoughts on how we  
125 can maybe try and address that if that's possible. The next one is the second phase, which  
126 was some of the physical activity data. I could spend a lot of time on this. I'll just briefly say  
127 that in the literature there is not consensus on the best way to find physical activity from  
128 accelerometry, which these bar charts are from very often, and so there are a lot of factors  
129 around different protocols, different monitors, different placement of the monitors. So that  
130 meant that maybe those data we see from the kids in the study are not representative, that  
131 a mean of a hundred and ninety-two minutes over three hours per day is far too high to be  
132 realistic. There were some outliers here, so at the bottom right, three or four hundred  
133 minutes a day of physical activity, that's definitely an anomaly. The middle one and the one  
134 on the left are a bit more typical, actually. One's from a wrist-worn accelerometer, one's  
135 from a hip-worn one, probably a little more representative of what we'd expect to see. So  
136 we can't put a lot of trust in the data, if you like, just from the few children that wore the  
137 monitors in this particular...Right, I've got one more, which I shall just finish up on. Now this  
138 was about...There's some really good information here in phase three, and I've tried to  
139 summarise it a little bit. Two points for me. The health professional data and the physio data.  
140 Physical activity monitoring is used, the term is used in the same way as what we term  
141 exercise or fitness testing. So there seems to be some disparity there between  
142 understanding of what activity monitoring actually is, as opposed to testing for levels of  
143 performance or capability. So that's about a bit of an education from a professional's point  
144 of view, to kind of separate those processes, and the box at the bottom was just to think,  
145 "Well, what's the purpose of monitoring activity?" It might depend on who it is for, so as a  
146 motivational tool, which I guess from the participants, all the things that have been  
147 mentioned about, feedback, immediacy, interaction, aesthetic, comfort etc, which are quite  
148 different from a research point of view, where we're more concerned about being accurate  
149 and not being tampered with, and having lots of great data and then applying that. So it's  
150 maybe bridging the gap a little bit, and I think the clinical outcomes. That's just my  
151 perspective, maybe bridge those a little bit better, I guess, so involves talking about that in a  
152 bit more detail when we get chance, P2.

153 P2 Right, you're on.

154 P5 Super. Well, well done for completing the study. I don't think I've ever spoken for three  
155 minutes on any subject in my life ever, but I'll try.

156 P4 We've all failed so far.

## CF Expert Meeting

157 P5 My impression was that you haven't selectively chosen children who were doing a lot of  
158 activity. I thought there's been a sort of purposive selection of some children who weren't,  
159 so I'm quite kind of buoyed with the amount of activity they were doing, and also with the  
160 engagement they had in the study. I think that was very good, and sort of encouraging, and  
161 lots of really encouraging things come out of this project. The way that the health  
162 professionals feel it's really important, and the physiotherapists say this is a really key  
163 element of what they're trying to do is physical activity monitoring, and we're not doing it in  
164 a very consistent or valid way. I find the whole thing has been really interesting, because  
165 we've been taken over by Nike and Apple and everybody, and this whole area has become  
166 sort of very trendy, very hippy, very American. I mean, I go to America, and I see all these  
167 guys wearing their devices all the time now, and that's really interesting in that there's been,  
168 because some of the statements talked about stigmata, and I think that's a really big thing  
169 for our patients, and it's been a bit upsetting in a way to read about, like they didn't like  
170 being asked about it, and I think that's a really key element for the patients. But actually,  
171 that's been overtaken, in that these devices are now going to become, well, are also quite  
172 trendy and a part of life. So that's kind of encouraging really, but it still makes this work very  
173 important. So the questions I have, and I think you've raised compliance, which is a key  
174 element. So what I have in my mind is a vision that all my patients do lots of exercise and  
175 they have a lovely time, but I'm obviously deluded, and we know that there are some who  
176 don't do any exercise, who actually find exercise quite abhorrent. So I have an anxiety about  
177 actually stigmatising them, making them feel guilty, making them do something that is a  
178 burden, a complete burden, and actually, if you make it something that they've got to do,  
179 even the children that like exercise will find it a burden. So I'm in a difficult place at the  
180 moment. I don't know the right way forward. I think this has given me a lot of pointers, but I  
181 think what the bespoke model that somebody talked about, about individually assessing  
182 individuals is really important, but on the other hand I don't want to discriminate, so I want  
183 these things to be available to everybody. So it's not just going to be our very well-off, well-  
184 to-do patients from mid Cheshire who have all got these bracelets and are doing the right  
185 things, and all our less well-off patients from more deprived areas are excluded and  
186 discriminated against. We've got to make sure that doesn't happen, but we've got to have a  
187 firm evidence base to be able to go to funders and say, "Look, we need to not only monitor  
188 the physical activity of the patients, but also their whole family", and I think, was it you that  
189 said something about that, P3? I think that's really interesting. I didn't quite understand  
190 what congruous between parental and participant. We can talk about that in the discussion.  
191 So have I gone over?

192 P1 Yes, just a bit.

193 P5 Oh, I think big brother as well. I haven't really got to the point where I understand how they  
194 feel about us knowing how much physical activity they're doing. I think we've made inroads,  
195 but I still don't know whether they're comfortable with that, and I think that's really key,  
196 because we've got to be working in partnership with them.

197 P1 Thank you very much. OK, so there's been quite a few key issues raised there, all interesting,  
198 some convergence, some not. Who'd like to start the discussion?

## CF Expert Meeting

- 199 P5 What did that mean? Congruous between parental and participant physical activity-related  
200 was reported congruence.
- 201 P1 Yes, so they both agreed, in terms of...
- 202 P5 Physical activity-related beliefs. So if the parents had good beliefs with regard to the need,  
203 then the children were the same.
- 204 P1 Yes, they pretty much agreed. They both seemed to come from the same page, the parents  
205 and the patients.
- 206 P5 And did you find the other was well, that the parents who weren't so supportive, because  
207 we have quite a few of those, but maybe they weren't in...
- 208 P1 In the sample, no, I don't think. I think they were all quite positive, and all quite supportive  
209 of the kids', or the children's levels of physical activity, and quite encouraging, really.
- 210 P4 Yes, I think I think I might have had the parents demonstrate that positive perception.
- 211 P1 In what, sorry? I don't quite understand.
- 212 P4 So it could be, we might share a belief, but so then I might go off and I might be a  
213 perspective person, or it might be that I drive you to that sports club, or it might be that I  
214 give you lots of encouragement or feedback, or... did you get a sense of how that was  
215 manifested?
- 216 P1 Yes. So I got a sense that the parents did encourage the children and young people to take  
217 part in physical activity, that encouragement could be, and it was all, I suppose this is the  
218 point, isn't it? It's individual to each family. So you might have a family who you may  
219 describe as being a lifestyle...they've sort of embraced the whole physical activity lifestyle, so  
220 that as a family they'll go off and they'll go walking, or they'll go on days out which involve  
221 some sorts of activity like bike riding, or maybe go to the gym together, but then the other  
222 scale, you may have parents who aren't that keen on physical activity, but recognise the  
223 need for their child to be engaged in physical activity, so would encourage them by driving  
224 them to activities, encouraging them to go and play out, and even for people where, for  
225 whatever reason, structured activity may not be a particular feature in their physical activity  
226 profile, if you like, or what they engage in, it could be just, you know, "The weather's lovely  
227 out there, don't be sitting there on the Xbox, get outside, go and play football with your  
228 friends, go and knock on your friends, go for a walk", that type of thing. So there was the  
229 whole, I suppose, spectrum really.
- 230 P3 I think that's perfect. I mean, that resonates with what we find with interventions with  
231 families generally, is that there are parents who support physical activity, those that model it,  
232 those that go and engage in it and immerse themselves in it fully, and then those that are  
233 more passive and say, "Oh yes, I know it's good for you. I just can't be bothered, but I'll take  
234 you to swimming, or I'll take you to karate". So for me, one of the things that...
- 235 P5 And actually, quite a few people won't even take, because it's an effort on their part, so...

## CF Expert Meeting

- 236 P3 Often cost as well, isn't it?
- 237 P2 Yes. But I think one of the things that came out for me from the whole study was that  
238 actually, a lot of what has been reported we see in mainstream interventions with non-  
239 clinical populations through schools. So we see exactly the same, and in the same way, it  
240 might be helpful for parents to be reinforced in that way, that that's perfectly normal. I  
241 guess they're taking their point, their normative reference from having a child with cystic  
242 fibrosis, but we see that in a lot of the studies that we're engaged in, that parents have this.  
243 You know, do they not get involved, or there are concerns around that, and helicopter  
244 parenting, and these sort of dance Mums, and all this type of thing, but there's lots of  
245 different ways to parent your child other than activity.
- 246 P5 But they're like the facilitators, aren't they, the sort of, we take them here, we take them  
247 there, join this club, join that club? But I think we're talking just more about the sort of  
248 parents showing doing the activity themselves, and the children looking at them as role  
249 models.
- 250 P4 Well, I guess there's one example. Yes, because it's this kind of indirect and direct kind of  
251 positive reinforcement of physical activity, and it's probably the more indirect kind of subtle  
252 messages which builds up those kind of competencies, those perceptions, which probably  
253 have more longevity in terms of having this effect, rather than Dad goes running, therefore it  
254 seems a good thing that I should do that, you know what I mean? So the strength of that  
255 kind of reinforcement isn't as good, as P2 said.
- 256 P5 ...Go out and do something. It never works. If they're on the Xbox and you go, "Go and do  
257 some activity".
- 258 P1 They're not going to do it.
- 259 P5 But if they see what is a normal part of your life is playing squash or cycling to work or going  
260 out running, then they'll go, "That's normal", and then eventually they will, when they're of  
261 an age where they're cogent, we see them sort of blossoming at about seventeen, eighteen,  
262 quite a lot of them sort of go, "This is something that I need to do".
- 263 P1 I think that, picking up on that point, there are a couple of families who do really stick out  
264 the way you're saying, issues of reinforcement, and it's those, I suppose modelling to a  
265 certain degree, the way some families where the parents, where they're particularly active  
266 and regularly engaged in activity of sort, again bike riding, going the gym, and even the  
267 young children, young people with CF, they would accompany them also. So they might all  
268 jog down to the gym together, and then go on a piece of equipment together. There was a  
269 couple of families.
- 270 P5 We encourage that, don't we?
- 271 P3 Yes, I was going to say. We've got families whose parent who won't be particularly active,  
272 but will join the gym and go swimming with their child, just so that...
- 273 P5 The driver is to engage the child, because that's interesting...

## CF Expert Meeting

- 274 P3 That's right. And they're the ones that really have difficulty, and I do feel that each child has  
275 their own independent either joy or hatred of exercise anyway, whether they've got CF or  
276 not, just going by your own book, but actually, the ones that are quite inactive, you've got  
277 parents like that who will, you know, we have got them, maybe not in the study, but we've  
278 got them, that will actually go to that level to actually swim with them, or go to the gym so  
279 they can go swimming, or...
- 280 P5 We do have some where it goes actually to extremes, and we say to them, "Activity is a  
281 really key element of having a good and healthy and long life with CF", and some of them  
282 take that on with spades...
- 283 P3 And then actually...
- 284 P5 And then when they come to claim, you say, "What are you doing?" and you just go, "Oh."
- 285 P3 And their weight's gone down.
- 286 P1 Yes. So it sounds like you're saying it's a balance.
- 287 P5 That's not very often.
- 288 P3 But there are extremes.
- 289 P5 I do worry a bit about them, because sometimes they burn out, don't they, and teenage  
290 rebel, and then stop doing activity. We've had a few of those, who have been very, very  
291 active at junior school, and then stop doing any sport or...
- 292 P3 Yes, particularly GCSE year, kind of that year, because academic-wise, you just haven't got  
293 time, and we've seen lung function drop during that year.
- 294 P5 But the ones I worry about the most are the ones from really chaotic households, deprived  
295 circumstances, where people are coming in and out of the house. We can't even begin to  
296 imagine what their lives are like. We do have a lot of patients like that, and they can only  
297 exercise by sorting it out themselves, and so there is a real discrimination against them.
- 298 P1 Where do you see physical activity monitoring as it's been tested within the study helping  
299 those kind of people out?
- 300 P5 Well again, what you need to do is help their resources, to be able to structure doing stuff in  
301 their lives, and they quite often do go out and find things, don't they?
- 302 P3 Yes.
- 303 P4 It might be to the point where the extent to which they value that behaviour as being  
304 important to determine whether or not they will engage in any role in a form of monitoring.  
305 You could give someone a piece of equipment, but if they don't attach importance to that,  
306 then they're not generally motivated to wear it, and what maybe connects me a little bit is  
307 this whole idea of lifestyle approach work, and we see it a lot in our school-based kind of  
308 interventions, where we look at well, there's a school day, these are opportunities for



## CF Expert Meeting

309 physical activity as opposed to certainly being seated, and they don't have to be structured  
310 or exercise, but they can be quite incidental, they can be quite social, and it's about building  
311 those in really, and it's almost, I mean, apart from the references to CF in some of the  
312 documentation here, we could almost be talking about any children really, in terms of some  
313 of the...

314 P5 I think there are a few key things in here, P4, that do worry me. Their perception, particularly  
315 what P3 raised, that they are not normal, and I am really shocked by that, and I don't know  
316 whether that was a common theme or just one or two people saying.

317 P3 See, we wondered that, whether that was across the board, or actually that was one person  
318 kind of...

319 P1 I think there was an acknowledgment that the young people are aware that they've got CF,  
320 and they know that it's a chronic condition, and it's something that they are aware that they  
321 have to, I suppose, assimilate into their lives, but not let it define them. That's what I got as a  
322 main theme. So there's a recognition there that they have a condition that does make them  
323 different maybe to some of their peers. However, it doesn't define them, if they're right,  
324 maybe clarifies it a bit better. So they're aware that running a hundred metres may be more  
325 difficult to them than their non-CF friends. However, it doesn't stop them from necessarily  
326 doing it. So it's almost like an acknowledgement, but not...

327 P5 The vast majority of our children, we would expect them to be as good, if not better than  
328 their friends, because we have encouraged them, and they have very good respiratory  
329 capacity. We have a few, we have a very small cohort, who have quite significant lung  
330 disease that does impact on their capacity to do cardio-pulmonary exercise, but they  
331 shouldn't hold them back from doing it. I mean, quite the opposite. In fact, some of them are  
332 so driven that they are actually very good at doing shuttle runs or whatever, despite the  
333 severity of their disease.

334 P4 Would it mainly manifest itself, depending on the intensity of the activity and the duration to  
335 which they were doing it for?

336 P5 P3 could answer that.

337 P3 Yes, I think it might, actually. Kind of the longer the activity, they get tired. You know when  
338 you do one of the exercise tests, the modified shuttle, it's not breathlessness that necessarily  
339 stops them. It's actually their legs are tired, and it's kind of working out really, whether  
340 they're unfit, deconditioned, or actually it's not always...I mean you've got some, obviously,  
341 but it's a very, very slow start to the test, very slow, so it's an endurance test, if you like,  
342 because thirty-five minutes, thirty minutes, I think it takes to complete, and we do have  
343 some that have completed it. We have that level of fitness, but a lot of them, the younger  
344 age group or mid age group, it's their legs, they're physically tired.

345 P4 Local muscular, kind of?

346 P3 Yes.

## CF Expert Meeting

- 347 P4 Do you do any ratings of perceived exertion during the test as well?
- 348 P3 Yes, we do. We do the Borg scale, and we do the sliding, what do you call it, the...
- 349 P4 The Omni scale? One to ten?
- 350 P3 Yes. We do that as well.
- 351 P4 So they're getting, as you'd expect, they're getting when they drop at the test, when they  
352 finish the test, are they scoring...?
- 353 P3 High.
- 354 P4 Yes, so back to...
- 355 P3 Yes.
- 356 P4 OK.
- 357 P3 So we do the exertion, the dyspnoea and the linear scale at the bottom, yes.
- 358 P5 There are a couple of centres around the country that actually formally measure CF, don't  
359 they?
- 360 P3 Well, that's what I was interested in, and there's only the four there that do that.
- 361 P5 That's quite a few. I mean, and you can probably see why they do it, and for the engaged  
362 patients, they really love it, because they like to know what their VO2 max is, and how they  
363 could improve it.
- 364 P3 You know, in everyday life, I see the field tests as being more important, because you want it  
365 as their normal activity, what they're coping with functionally, which I think those, you know,  
366 the step tests, you've got stairs everywhere, and kind of the shuttle, I think they can be more  
367 realistic to me than looking at, unless you've got an athlete or you're looking at that. So I  
368 don't know, we haven't got that facility, and many places don't have the facility for VO2 max.  
369 I mean, we shortly will, won't we? And what we do with that, but the field tests are what the  
370 majority of centres have got, because you can do that in a very small space.
- 371 P1 How do you feel the patients will respond to the VO2 max?
- 372 P3 I don't know. I think the good ones will love it, because it's another test.
- 373 P5 It's quite an intensive thing for them to do. They are competitive.
- 374 P3 Yes, competitive, and I mean, we don't encourage competitive between others, but we do  
375 encourage competitiveness within themselves. They will always, when you do the shuttle test,  
376 they will always say, "What did I do last year?" And their motivation was to do better than  
377 last year.

## CF Expert Meeting

378 P2 I think that links in to this notion of feedback and immediacy of feedback. They strike me as  
379 a group that they get a lot of information about their condition, and they're very  
380 knowledgeable. I'm just looking at the literacy around in the transcripts of them talking  
381 about their condition. They're very articulate, and therefore that for me was something that  
382 came out, that they want that type of feedback, so they can do the VO2 max and get  
383 immediate feedback. The same from the devices. And I take P5's point about for those that  
384 maybe have lower scores, that it could demotivate them, and therefore perhaps there needs  
385 to be some individual counselling around employing things like this. In the same way, I guess  
386 as a parallel, things like GP referral schemes, that when people start exercise or cardiac  
387 rehab, and there is some behavioural support around that in order to ensure from a self-  
388 perception point of view, from a competence point of view, that that's reinforced, and they  
389 understand how to deal with that feedback, rather than it just being a number, that there's  
390 some interpretation of that, and I don't know whether from a capacity point of view, that  
391 that would be reasonable or practical to do from yourselves as clinicians.

392 P5 Oh God, yes. I mean, so you ask the question, there's a number of questions I have here  
393 relating to that, but also other things. So you asked about how they would assimilate the  
394 information from a VO2 max. I'm not even sure I know how they would assimilate the  
395 information from a physical activity monitoring from this, I don't think, yet. But you're going  
396 to have, you can set them goals, and we would set them goals, we're constantly setting them  
397 goals, but if you set them goals and they could achieve those goals, which is great. We set  
398 them more goals, and so on, or they could nearly achieve those goals and not do to badly, or  
399 they might fail completely because they're lazy, or they might fail completely because they  
400 haven't got the capacity and resources to actually do what they've set themselves. They  
401 might have set those goals themselves. So I don't know how each of those scenarios is going  
402 to affect them, benefit them, help us in the partnership with them. So that's a key element  
403 for me. I want to know that if we're going to use this in the formalised way, what impact that  
404 will have on the patients, all those different outcomes, and I think that's the key, really.

405 P2 I'd say from a parallel, in terms of GP referral, that's really important, the regular contact  
406 with somebody, an exercise specialist or a psychologist, that they can help with that when  
407 they don't meet milestones, and help them to deal with that. It's not just a case of setting  
408 them on a programme, and research suggests that when you add behavioural counselling in,  
409 rather than just exercise prescription or exercise monitoring, that the effects and the uptake  
410 and the sustainability into a lifestyle choice, and they become more autonomous, and that  
411 that really helps. So for me, I agree. We need to look at what the impact of that feedback.  
412 They can pick a device that gives them that type of feedback. They can pick a device that  
413 doesn't give them that type of feedback, if we had a menu of ones that are available, looking  
414 at different types of devices. But I guess it's an individual choice that requires some kind of  
415 counselling or support alongside that, so that they understand how to be able to deal with  
416 that, so what happens if we don't hit a milestone this time. Because certainly, throughout  
417 the interviews, they are very good at goal-setting for children and young people, so that's  
418 obviously coming through, that they're set goals, and they're very knowledgeable at  
419 understanding around that condition. So it seems that the foundations are there, but the  
420 choices around the devices, and how we deal with not hitting milestones.

## CF Expert Meeting

- 421 P5 I think achieving the goals is almost harder than not achieving the goals, because then where  
422 do you go? Where's the next? I mean, not achieving the goals, then we can start to  
423 investigate why they're not, why their physical activity is not improved, why it's poor. We  
424 can look at the causative mechanisms. But if they are actually, they set themselves a goal  
425 and they achieve it, then where do you go from there? It's sustainability, and that's very hard.  
426 So...
- 427 P4 You'd expect activity to drop through those years anyway, so actually, maintenance and  
428 even decreasing the decline seems a positive outcome in terms of activity interventions. And  
429 I think stuff like the goal setting, and in one sense, it could be a number, so you have so  
430 many steps per day or so many minutes of activity, but some of the devices, if they look at  
431 patterning over the day, then you've got a bit of a better feel for where the activity's  
432 occurring, and then you're a bit more informed about how you can intervene or set goals. It  
433 might be a goal about what you do after school, for example, rather than a global be more  
434 active.
- 435 P2 Yes, it could be an active travel type of approach.
- 436 P3 Yes, like walk to school instead of getting in the car.
- 437 P4 So the level of detail from the device actually could be a mechanism by which you can  
438 actually provide a better level of feedback, and also conceptualise that in terms of, "Well,  
439 you've done X number of minutes of activity today. Actually, that compares nationally for  
440 mainstream children like this", because most children are relatively inactive, and so those  
441 low expectations which you referred to, P3, actually they might be over-egging that a little  
442 bit, because most kids aren't that active per se. Well, they might see themselves as being  
443 less active because of the condition, where the reality might be quite different, so it's almost  
444 like saying, "We've got some mainstream kids here. They wore the monitor. This is how  
445 active they were, this is how active you were", and the line might be, they might always  
446 think it'd be like that, but it might not be.
- 447 P1 Can I just take it a step back a minute? You mentioned, P3, about, and it ties in with what P2  
448 was saying about letting the patient choose the device, and showing them the alternatives.  
449 You said you had a little bit more to say about that earlier on.
- 450 P2 Well, it's just, I think...I've forgotten what I was going to say.
- 451 P1 Oh, sorry if I put you on the spot.
- 452 P5 This sort of bespoke approach to sort of each individual patient developing their own  
453 individual programme is very sensible, isn't it? And it's kind of what you do outside of CF that  
454 is what would be recommended, isn't it? So...
- 455 P3 They've got to be interested, and it's got to be, because, I mean, you have families who'll go  
456 through every sport, and you think, well actually, the child will choose what they want to do,  
457 and you'll get motivation to continue, and sustainability with that, because they enjoy doing  
458 it, but if they make them swim or make them do something, and you'll find that some

## CF Expert Meeting

459 families literally go through, you know, they've got tennis one night, and swimming the next.  
460 You know, there's kind of, you think, "Crumbs!"

461 P4 But then it's that flip in that, from an education point of view, of what is physical activity,  
462 and it's not just a sport model and a structured model and a coaching model and a  
463 performance model. Looking across that typical day, and those opportunities, and going back  
464 to that as a start point, and do you walk to school? Or what do you do at playtime, or when  
465 you get in from school, what do you do? And it can be those things, as simple as go and  
466 knock for your mate over the road, and because some kids will naturally gravitate more  
467 towards that, while some children will gravitate more towards a more kind of performance-  
468 orientated type of activity.

469 P2 I know what it was I was going to say. It was, you know your kind of, your organised and  
470 structured kind of activities? That period that they're at football training, or they might only  
471 have a short period of time they're actually really active within that, as opposed to cycling to  
472 their mate's house up a hill on a bike. You might actually find that they're actually doing  
473 more by doing that, rather than paying for education, and just looking at exactly...but you  
474 would see the intensity that they're doing through the devices, depending on what do you  
475 want to see from...how do you choose the device. You've got to have useful information that  
476 you can get off that.

477 P3 From a family point of view as well. So as well as sort of school-based interventions, we've  
478 looked at family interventions, and I think parents have that perception of, "Right, I want my  
479 kids to be more active. Right, they're going swimming to swimming lessons, they're going to  
480 go to rugby training on a Friday". Certainly a lot of the mainstream research, they don't  
481 understand the chief medical officer's guidelines on physical activity. They think it's you've  
482 got to be sweating and running round a field, not about, well, that could be accrued through  
483 discreet periods in the day, being more active at playtime, walking to school, playing out  
484 after school. So I think that there's some education around that from the parents as well,  
485 with this perception of normality, because they think that, as I say, they're just  
486 misinterpreting those guidelines and that individual nature to, ok, so let's look at you as a  
487 family. What opportunities are for you as a family from an intervention point of view? What  
488 can we do to support your family unit? And certainly other studies we're involved in is  
489 looking at physical activity monitoring for the whole family.

490 P5 I would love to do that, yes. But you have to have, if you're going to fund something like that,  
491 you know, we need twenty thousand pounds for the whole of our clinic probably, to provide  
492 them all with appropriate devices. You'd need to have a very good evidence base to support  
493 that sort of approach.

494 P1 So P4 mentions contextualising the physical activity, tying in with what you said about  
495 structured activities not necessarily achieving the intensity. Would there be any sort of  
496 benefit in that?

497 P3 Well yes, I think, as P2 said before about, throughout the day, school day, weekends, kind of  
498 spreading out...

## CF Expert Meeting

- 499 P5 Using opportunities.
- 500 P4 From your point of view, is an improvement in absolute fitness very, very important, more so  
501 than improving general activity?
- 502 P5 The data from the adult studies suggests that an improvement in actual fitness is associated  
503 with better quality of life, better survival, formally measured, and that correlates with level  
504 of activity, so I see what you're saying?
- 505 P4 Well yes, because that's where the intensity element of sort of structured physical activity  
506 like the sports club in theory, if done well, should result in a higher intensity, whereas maybe  
507 the more incidental stuff is more probably moderate and light intensity, and so if an  
508 important outcome is to improve cardio INAUDIBLE (47:00) fitness in intensity, and the  
509 volume needs to reflect that, perhaps rather than an emphasis on more generic moderate  
510 and light activity, but I guess the trade off there is one of motivation, magnification and all  
511 those kind of things.
- 512 P3 I think, even the less intensity, the changing from an airway clearance point of view,  
513 changing body position, changing the way you breathe, that all has benefits as well, so in  
514 some of them that we are using trampoline particularly, you're using it in a different way to  
515 actually promote, because some might not use, they won't do their physio, they won't do  
516 their normal airway clearance, but they will do exercise. So actually, there are things that we  
517 can guide them into. You do change those ventilation rates with body position, and actually,  
518 that will help with their airway clearance, not necessarily their fitness.
- 519 P5 But what you're trying to say, P4, that maybe that can be concertinaed down into sort of five  
520 minutes really, really vigorous exercise.
- 521 P4 Well, there's high intensity interval training, stronger evidence base in adults, so a big debate  
522 whether that is really a public health kind of strategy in terms of physical activity and health,  
523 but there is some evidence in children that those approaches can be effective, and certainly,  
524 yes, those thirty second whatever it is, sprint or something very, very strenuous, short rest  
525 time, short repeats, there is some evidence to suggest that would have a beneficial effect on  
526 VO2 peak, for example, but it's not as strong as the more kind of commonly held moderate  
527 physical activity kind of messages.
- 528 P5 Yes, and you can always visualise that more in adults than in children. The data from Toronto  
529 that we've talked about before in CF children, showing that CF children who do exercise  
530 more formally have a better respiratory function. Did they measure parameters of VO2 max  
531 and that type of thing, or was it just the physical activity monitoring?
- 532 P1 I don't know, sorry.
- 533 P5 I can't remember, but that would be something important.
- 534 P1 OK, so we've been chatting a little bit longer than expected. I don't know whether you feel  
535 that you've come to a point of consensus, or whether you want to talk a little bit more over  
536 ideas and opinions. So the main themes that sort of came out for me was like there's lifestyle

## CF Expert Meeting

537 approach, reinforcement through family, parental encouragement, and also what came out  
538 for me was parents being facilitated, and the patterns of physical activity levels, and as such,  
539 reflect those seen those among mainstream non-CF young people and children. An area of  
540 concern seems to be the point of stoppage, and again, this seems to reflect mainstream  
541 children and young people in the teenage years are quite critical. That could be because of  
542 academia or academic pressures, such as GCSE year being a prominent issue, rebelling  
543 against parents, sort of the parental encouragement almost backfires, but there is also, I  
544 suppose, that, I won't say forgotten group, that's not fair, but that other group, sort of the  
545 opposite of those who get a lot of parental encouragement, those young people and  
546 children who have chaotic lives, and people coming in and out of their lives, how would  
547 physical activity monitoring help them? Experience of CF symptoms was discussed, and we  
548 spoke about what emerged from the results, the themes that emerged, the motivation, and  
549 issues of people who maybe feel demotivated. How can we help them with physical activity  
550 monitoring? And this sort of again pushes towards a more tailored approach. What can we  
551 do to reinforce those children and young people? Would we bring in other approaches to  
552 help them, such as counselling and motivational interviewing and that type of thing, looking  
553 at cardiac models as well? The type of tests that are done, that was brought up, so short  
554 tests at the moment. There was a discussion about an issue of it's more of an endurance test,  
555 or is it a fitness test, and the importance of field tests was particularly highlighted. How can  
556 that measure or reflect what happens in the children or young people's real life, real setting  
557 as such, and there's a concern about how children and young people assimilate the  
558 knowledge and the feedback that the devices give to them, how they can assimilate that into  
559 their own sort of experience of physical activity and exercise. Hang on. I'm just trying to  
560 make sense of my own notes now. Again, there's some adult evidence with regards to the hit  
561 approach, adult evidence with regard to fitness being an indicator of longterm outcomes  
562 such as quality of life and longevity, and how this correlates with physical activity, and there  
563 was a discussion about hit approach, and also there was some discussion about structured  
564 activity. You can go to a structured activity, but it doesn't necessarily mean that the young  
565 person will be active during those times to a level or intensity that'll have health-related  
566 benefits. And, I suppose tied in with that, there was a discussion about perceptions of  
567 normality, in terms of interpreting the guidelines, and that feeds into parental knowledge  
568 really, in this family model. There seems to be quite an issue, a more prominent issue,  
569 parental understanding of physical activity, and parental uptake and initiation of an active  
570 lifestyle, and they were the main themes that came out for me.

571 P3 You've done well there, P1.

572 P2 Hasn't she? Excellent.

573 P1 Is there anything anybody wanted to add to that? Detract, take away?

574 P5 So just to finally just focus on the differences between the cohort that we've looked at and  
575 children without CF, so what would you say those are? Obviously this perception of maybe  
576 not being quite as able as children without CF to do exercise. So that's one point, and also a  
577 more pressurised situation in that we, if you like, have been prescribing exercise all their life,

## CF Expert Meeting

- 578 so that can lead to some tension, possibly with the parents and with themselves, as they  
579 grow older and don't do the exercise. But those are probably generic problems. But I don't  
580 think a child without CF would have quite so much pressure on them to do exercise.
- 581 P1 No. Within the children and young people that were interviewed, I don't feel that it was  
582 necessarily, exercise and physical activity wasn't deemed as a chore.
- 583 P3 Good.
- 584 P1 I didn't get that. I really didn't. It was just something quite natural.
- 585 P3 We try not to. Yes, we try and take the emphasis kind of off the prescribing aspect, you know.  
586 Certainly in the adult world, it will be prescribed, but that's not the way we bring it up here.
- 587 P1 I always enjoyed as well that emphasis was brought across as well, so it wasn't like, "Oh, I've  
588 got to go and jump on the trampoline for ten minutes". It was, "Ooh, you know, I can go",  
589 like one person skated in her Mum's kitchen on a Saturday afternoon because it was fun,  
590 and her Mum didn't care, because they were getting exercise, you know, engaging in an  
591 activity. So it wasn't deemed as anything negative. In fact, in many respects it was deemed  
592 as an opportunity to socialise, and socialise with other people where condition isn't an issue,  
593 which kind of brings in physical activity being a normative, I suppose, escape, really, and as  
594 well there was that competitive element, "I can do what they can do", but I think within that,  
595 there was a recognition that there is an underlying condition there.
- 596 P2 I think one thing that we might need to look at is almost this particular project, if you're then  
597 taking money out of the equation, which seems a bit random, but in terms of what we've  
598 done with a group, that process could then operate at an individual level, so in the same way  
599 that we've conducted interviews with parents and children, and then given them the choice  
600 of devices, and then consolidated that with a survey. It almost feels like there's a possible  
601 model there that could be supported with some behavioural counsel. We didn't take them  
602 as far as looking through the results. I know some of them were very inquisitive about the  
603 field. What does it mean? And some of the devices give you that instant feedback and some  
604 don't, but there's almost a model there to be able to take them through, in terms of the  
605 activity monitoring and this kind of wraparound support. So rather than it be exercise  
606 prescription, that there is some support around that to help them to know what the data  
607 means, and supporting the family and that kind of intervention. We've stopped short of that,  
608 but I know it's a formative study, but actually the structure of that, if that could be brought  
609 into some kind of model that could be operationalised with the patients that you've seen in  
610 a consultancy model, it might have some benefits, albeit a protracted. It doesn't need to be  
611 over weeks and months like it was here, but I guess the main facets of that process would  
612 seem to be useful in bringing that into clinical practice maybe. Maybe I have a Utopian view,  
613 but is there anything that you think would be reasonable and practicable to look at?
- 614 P5 The people who are looking at adherence in CF are, there's a trial going on at the moment in  
615 adults coming out of Sheffield, which is looking at analysing each individual patient, the  
616 underpinning issues that cause their non-adherence, and then providing a bespoke tool,  
617 whatever that is, to improve their adherence, and you could argue for a similar sort of thing



## CF Expert Meeting

- 618 for our patients with regard to assessing their physical activity monitoring, looking at their  
619 life, their lifestyle, and then providing them with a bespoke, but you don't like prescription,  
620 but sort of advice and get them setting their own goals.
- 621 P2 Yes.
- 622 P1 I suppose there could be an argument that by involving the patient as well, that might  
623 actually bruise adherence.
- 624 P3 So by doing it in a donation theory point of view.
- 625 P1 And doing it in a supportive way, rather than a chastising way, for want of a better word.
- 626 P5 Or a dictatorial sort of way, so they come in, we say, "You've got to do this". We're just then  
627 becoming like the parents, aren't we? Yes.
- 628 P2 Well, certainly some of the barriers, when you look at the barriers, when you look at the  
629 whole data set, are around chaotic lifestyle, other things that are controlled that need to  
630 have that family intervention in order to generate an effect. So you're almost setting them  
631 up to fail without having those foundations in place that, I guess, if you take the clinical  
632 population out and look at what we do with families generally in the community, that has to  
633 be the model that we operate has to be this kind of buy-in, and it has to be a whole family  
634 approach, and we're just recruiting on a study at the moment looking at whole families, from  
635 a monitoring point of view, and that's quite interesting. So yes, I think that that's something  
636 that could be taken forward. There's lots of inspiration from other programmes, whether it  
637 be children with obesity. In interventions with the child with obesity you don't just, for want  
638 of a better phrase, treat the child, you work with the family, from a multi-disciplinary  
639 approach. So without wanting to make too many parallels, there are models out there that  
640 say, "Well, if you just work with the child", we know if you just work with the child in school,  
641 and not look at the other...So maybe looking at the family, because it's often, from the data,  
642 parents can be barriers to this perception of normality. So the parents have a different  
643 perception of normality as to what a normal child at that age would do activity-wise, but also  
644 in terms of general physical activity themselves. So maybe re-addressing those perceptions  
645 may help the child's perceptions of low competence, when actually, they could be by virtue,  
646 normal.
- 647 P1 So I'm conscious that we've been chatting a little while, but we haven't really talked about  
648 the clinical aspects, and the results that emerged from the survey. So I don't know whether  
649 you fancy a five minute break. I'll list the ones that are more...and maybe....
- 650 P2 ...Counselling, testing and monitoring, in terms of trying to consolidate the point that there  
651 needs to be some education for practitioners, parents, children, and more or less like  
652 wraparound counselling around the physical activity, which as we know, comes at a cost,  
653 and then these notions, and it's not my area of expertise, but it's around testing, and what  
654 needs to be tested, that's relevant for lifestyle, as you said, P3, and then what we can get  
655 from the actual monitoring, and how valuable that's going to be, to look at discreet

## CF Expert Meeting

- 656 opportunities for... The testing and the monitoring will provide us with information about  
657 intervention.
- 658 P4 Where do you see the distinction between testing and monitoring?
- 659 P2 So testing, as I see it. This isn't my area of expertise, but the testing would be like the VO2  
660 max, then tests that go on here when the patients arrive for clinic. So the tests...
- 661 P3 The once a year...?
- 662 P2 Yes, so it's a one off.
- 663 P4 Could you not have that monitoring as an umbrella term, so the monitorings could be an  
664 ongoing thing in terms of the behaviours, and part of that is also monitoring the kind of  
665 products of that behaviour, which might be the exercise-type testing?
- 666 P2 OK.
- 667 P4 I just think, going back to the...Well, a few weeks ago there was a report called Generation  
668 Inactive, and so this body called UK active making what's lobbying calls, fitness testing with  
669 kids in schools, and it either pushes you that way or that way, really. But if you actually start  
670 to think about what monitoring evaluation of all that...
- 671 P5 Sorry, it pushes you...
- 672 P4 Well, it pushes you to, "Oh no, I'm dead against that", or "That's a great idea".
- 673 P5 Right, so it's quite...
- 674 P4 And it's quite a divisive kind of subject, unless you start to unpick really what it's about. It  
675 should be about monitoring and feedback and education, all those things. You could have in  
676 the banner of that is something around monitoring, or a less harsh term is testing. Testing  
677 infers pass or fail almost, and I'm just thinking about the language maybe, that we might  
678 want to use some of these things INAUDIBLE (tape 2, 02:32). Does that make sense?
- 679 P2 Yes.
- 680 P5 So a physical activity support package, as opposed to monitoring and testing.
- 681 P4 Yes.
- 682 P5 Activity facilitator. I don't know.
- 683 P4 Yes. The language is more supportive, rather than just mental...
- 684 P5 I mean, the companies that are doing it, Apple and Nike and so forth, they seem to be doing  
685 it in a very sort of, I don't know what the word is, but they seem to make it look a really  
686 lovely thing to do, marketing and so forth. So we could learn from them.
- 687 P2 I get the principle behind that is the instant feedback, isn't it?

## CF Expert Meeting

- 688 P5 Yes.
- 689 P2 It's about those individuals who are looking at, they're not getting somebody who then helps  
690 them to say, "Well, ok..."
- 691 P4 You might get that instant feedback, but you don't know how to interpret that information  
692 correctly. That could have a negative impact on your motivation, or a positive impact, or no  
693 impact.
- 694 P2 Yes.
- 695 P4 It could just be another set of numbers you're given, and it's about having a supportive  
696 network to enable you to understand what that actually means.
- 697 P2
- 698 In terms of the education, I think that kind of counselling, it doesn't have to be a psychologist. It can  
699 be, that type of support can be offered in different ways through different roles, through  
700 training, through educating parents. It's not necessarily about parachuting a specific  
701 practitioner in. I guess it's looking for that opportunity, capacity, and the willingness to sort  
702 of take on board some of that, in the same way that exercise professionals who work in  
703 gyms, they're not exercise psychologists, but they are very much at the front end of applying  
704 principles of exercise psychology in order to make sure that the people they address,  
705 whether it's the cardiac rehab plan or reducing obesity, whatever it is, they're sort of  
706 applying the technique. So it doesn't necessarily mean another specialist individual into that  
707 kind of arrangement that you have as a clinic maybe.
- 708 P5 So what does the evidence, so that's one-on-one motivational coaching, but it's their  
709 evidence in your theory that just monitoring activity makes people do more activity.
- 710 P4 No, probably not strong enough to say that. I think...
- 711 P5 Sorry to interrupt, but you've got to motivate. If you've got somebody who wants to get  
712 fitter, then the physical activity monitoring will help them to do that.
- 713 P4 It will be positive, it'll be stronger, if there's information which will allow them to know how  
714 to do it, where to do it, who to do it with, so the information...
- 715 P5 It's a facilitator.
- 716 P4 Yes. Information beyond the, "You've done x number of minutes. There's your goal for next  
717 week". It's about, "Well, how do I do them? How is that facilitated? What are the  
718 mechanisms for me to go from there to there?"
- 719 P5 So what we're worried about is, and I know your data don't suggest this, because they all  
720 seem to have done a lot, but we're worried that our patients are not motivated, this is  
721 another burden to them, so is just giving them this going to make them motivated or just  
722 make them miserable? I don't know the answer to that question.

## CF Expert Meeting

- 723 P1 I'd think, from what little, because obviously it was quite a small cohort, wasn't it, quite a  
724 small sample, from the information that was given and with regards to this place, I think it  
725 was sort of things like the Actigraphs and the accelerometers, they were received quite  
726 blandly, but they do look quite bland as well to the young people, and obviously the young  
727 people are engaged in the project, and wanted to know what level of activity they were  
728 doing, but they weren't able to get that information until after they'd worn it quite a long  
729 time.
- 730 P4 And that's the distinction between a research tool, because we don't necessarily want them  
731 to know how active they are, because then that will change their behaviour, against the  
732 wearable, consumer-led tool which has that at the forefront.
- 733 P5 And which is instant feedback gratification.
- 734 P4 Yes. But what's happening now is, there are more studies which are looking at the ability of  
735 those consumer tools to see how accurate they are, standing up against the research grade  
736 kind of...
- 737 P2 Because that is a push.
- 738 P4 Well, it is and it isn't in a sense, isn't it? I mean, if you've got maybe consistency of the tool  
739 or the time, so you know that is an increase or a decrease rather than an absolute level,  
740 maybe that's, from a motivational perspective, maybe that's more important than, because  
741 as I've shown on the other slide there, even with the research kit that we use, in the  
742 literature there's still lots of disagreement about how best to then interpret that information,  
743 and apply it in terms of public health messages.
- 744 P1 And I suppose one key thing to consider is, ok, like a commercial tool that gives feedback,  
745 but at what point does that feedback almost reach a saturation point where anybody'll look  
746 at it and go, "Oh, I've done ten thousand steps". When does that then stop becoming a  
747 motivational goal-set tool?
- 748 P4 Plus, I guess, there's risk there with the children in this study is that the Fitbit stuff, because  
749 it is very attractive, that the novelty of it might have been very positive for them initially, but  
750 do we know that would be sustained over time? And also there's those things which we've  
751 not been able to tap into which we know are risks the longer you put interventions in place.
- 752 P3 Can I add how useful it would be as a clinical team to have data on seven days wear time  
753 that you've got. Would that be something that would be relevant...
- 754 P2 Yes, because...
- 755 P5 Oh, it would be massively interesting. Whether it would do our patients any good is a  
756 different....
- 757 P2 Yes. It's whether you'll get them to do that. Or you might get...
- 758 P5 It would help us to identify problems, wouldn't it?

## CF Expert Meeting

- 759 P2 Patterns and...Yes.
- 760 P3 And opportunities for intervention.
- 761 P4 There's two research devices here. One was this black box on the hip. One was a black box  
762 worn on the wrist. So some of the kit we've got now is a wrist-worn device which looks like a  
763 watch, tells the time, it'll tell you steps as well, but it also will do all the research grade stuff  
764 as well. So I guess since we did the data collection, the field has progressed a little bit to the  
765 point where they've got a bit of a halfway house, because some of them are quite attractive  
766 to use, and someone doesn't go, "What the hell's that on your wrist?" Well, it's a watch  
767 obviously, and there's time, but it'll still garner the information for the researchers, so  
768 typically what we sometimes give to schools and kids is, "OK, this is a snapshot day, this is 6  
769 am, this is midnight, this is a trace of activity, this is moderate, this is light. What were you  
770 doing here?" And it is a connotation prompt. "This was in the morning, or this was playtime",  
771 and if nothing else, sometimes that's useful information. I could think of it in clinic for you  
772 guys is to set as a prompt, "Talk us through your day here", and you'd be surprised where  
773 these peaks and troughs actually occur.
- 774 P5 Is it measuring their heart rates as well?
- 775 P4 The kit we're using at the moment isn't. I mean, there's variations on this stuff all the time.  
776 So these are accelerometry-based, so they will measure accelerations. Yes, I mean, lots of  
777 different bits of kit out there obviously.
- 778 P1 I think a benefit to that type of kit as well would be it removes, as well as the feedback it  
779 gives to the young people, but it removes that stigma about, "Oh, can you tell me the time?  
780 Look at the state of your watch. It looks like an old man's watch almost".
- 781 P4 And they do actually look all right.
- 782 P2 We're finding that. So we're running some compliance studies with two age groups at the  
783 moment, some quite large sample sizes, around how we can increase compliance. So again,  
784 informative. So we're asking them what would make them comply, and then we're running  
785 the studies at the moment, and there are incentives. We incentivise as one of the, but  
786 there's also things like text reminders, immediate feedback, social conformity is a big one.
- 787 P5 This is all round exercise?
- 788 P2 Yes, this is around the device wearing. So one of the problems that we have is that we don't  
789 get incomplete data sets. So if you wanted a full seven day, say, it's important, in a similar  
790 way that we've done here, to ask children what's going to...We need to understand what will  
791 it take for you to be able to wear that? And not everything is about giving them twenty  
792 pounds worth of Amazon vouchers or whatever it is. Sometimes it is around reminders to  
793 put it on, take it off, in your diary, and social conformity. But then the other one that's  
794 coming out quite strongly is this notion of "We want to know what the data says. We want  
795 to know what the feedback is from the devices as well". So it isn't always money-driven.

## CF Expert Meeting

- 796 There can be things that can be employed that can increase the chances of compliance, from  
797 what we're finding out with other studies with children and young people, so...
- 798 P5 And how successful has that been, that sort of approach?
- 799 P2 We haven't got the data back at the moment, yes, but we did a similar formative approach,  
800 and we asked them what would make you comply, and now we're running comparison  
801 groups with different incentives across two age groups, so the younger primary school and  
802 secondary school. There are variations, as you would expect, in terms of what incentives  
803 they want across two age groups. But I guess the data that you receive to be able to work  
804 with needs to be seven days full wear time in the same way that...It's frustrating when you  
805 get data back and it's not complete as well. That would only be of value to you in the same  
806 way that it would be from a research point of view.
- 807 P1 So I'm just thinking, I'm conscious of time as well. What do you feel the clinical barriers'd be  
808 to these devices?
- 809 P5 Cost principally, and...
- 810 P3 It's actually looking at the information. That's a time issue and resource, isn't it? Who's going  
811 to look at it?
- 812 P5 But it would involve the families, and they are able to download the data, and you're sort of  
813 sharing that responsibility. Yes, but that was the vision, wasn't it?
- 814 P3 Yes.
- 815 P5 We're very keen to sort of have this where it's more of a partnership thing, rather than us  
816 watching them. They're watching themselves, and we're chipping in and giving them support.
- 817 P1 Would trust be an issue?
- 818 P5 Trust?
- 819 P1 In the parents.
- 820 P5 Well, we haven't . P3's done a lot of monitoring with electronic data capture with a nebuliser  
821 device, and we've always done that in a very open way.
- 822 P3 Yes. And actually, as you said before, they want to see the data. They want to see, you know,  
823 they'll come back and say, "Show me what I did", and the perception of what they did is very  
824 different, in a positive way sometimes, not just negative. But they do, they want to see. So I  
825 don't think...
- 826 P5 And you're able to adjust things to help them.
- 827 P3 Yes.
- 828 P5 So again, like a bespoke thing, you're going, "Well, look..."

## CF Expert Meeting

- 829 P3 That's right. It's tailored then.
- 830 P5 "You've not done one morning's nebuliser for the whole week. Let's get rid of that and focus  
831 on..."Then actually, when you do that they improve at doing the other types, so it's quite  
832 interesting.
- 833 P1 What would you identify to be the clinical facilitators of the devices? In that respect, and in  
834 terms of importance, who, where the responsibility lies? I'm looking at you.
- 835 P5 It's interesting that they perceive the physiotherapists as being the key, so with regard to  
836 exercise, because it should come from the whole of the team, shouldn't it? It should come  
837 from the dietician, the nurses. It should be like a team message coming across, but I guess...
- 838 P3 Well, I'm sure there is as well, but...
- 839 P2 Yes, they were asked about who, they were asked about an individual.
- 840 P3 Because we do the testing, so I think they will see, plus every clinic they see us. One of the  
841 questions is, "Tell me about what you've done the last couple of weeks, or since last clinic  
842 have you taken on a new sport?" That kind of...So I think they do definitely, because we do  
843 the most discussion about it.
- 844 P2 So it's because you're established in that role already, so it's...
- 845 P3 Yes. Either A or I, whoever's in clinic, we'll do the same.
- 846 P2 Almost pointless to try and create in somebody new, because the trust won't be there.
- 847 P3 Yes.
- 848 P1 Is there any other issues that anybody wants to discuss with regards to the healthcare  
849 professional findings, and where the monitoring devices fit in, in terms of clinical facilitative  
850 barriers, and the importance of the monitoring in terms of clinical perspective. OK, so what I  
851 got from the discussion then, again just to recap...
- 852 P2 Sorry, P1. Maybe we should just parallel that with research outcomes.
- 853 P1 Oh yes, of course, yes
- 854 P2 Just in terms of what we feel are the sort of priorities are in terms of research, or facilitators  
855 will agree with the cost, I think would be...We need some funding to be able to do this.
- 856 P4 Cost and compliance work across all, both users, and I guess the biggest difference is the  
857 type of data that is produced, the research outcomes as opposed to the users, and I hope we  
858 can...I don't know whether it's appropriate for the same tools to be used for both kind of  
859 outcomes, because I think they're designed for different things, aren't they, in a lot of ways,  
860 and this one Actigraph would go some way towards some of this stuff. I'm sure as this field  
861 moves on it will all merge into one, I think, in terms of usability.

## CF Expert Meeting

- 862 P5 I can't visualise an outcome that you would be interested in from a research perspective that  
863 patients wouldn't be interested in, because that would suggest to me that the research  
864 outcome isn't very important.
- 865 P4 Well, the data side from a wearable, that the user will see on, say, a Fitbit interface, would  
866 be so reduced down that in terms of from a research perspective, you'd need really to  
867 unpick that data to make sense of it, analyse it and interpret it in a more in-depth way.
- 868 P5 That's different to them not being interested. They'd still be interested, but what you're  
869 saying is it's too complicated to assimilate...
- 870 P4 Yes. There's a degree of, if you like, technical expertise required to deal with that data,  
871 interpret it and then apply it back again. I mean, ultimately I think we're about applying what  
872 we find to practice, and to the user. But I think at the minute the tools that are out there are  
873 designed for different groups for different purposes, although they're all telling you about  
874 physical activity.
- 875 P2 So in terms of research evidence, it would need to be the research grade devices that would  
876 be used to inform?
- 877 P4 Yes. Unless there's stronger evidence that the wear of the consumer tools actually stand up  
878 well enough against the established research tools.
- 879 P5 And so a validation of ....
- 880 P4 Yes. The Fitbits and what have you, yes. But those things are happening. Different groups are  
881 doing those already, so you find watch this space almost for that kind of thing.
- 882 P1 I suppose what came out for us was the cross-contamination issue, which didn't pose too  
883 much of an issue for us, but from a research perspective it may be an issue if you have a  
884 massive amount of children using a limited number of devices. We wouldn't want anybody  
885 to get poorly as a result.
- 886 P5 Cross-infection.
- 887 P1 Cross-infection, yes.
- 888 P5 Yes, we wouldn't. For this to become clinically available, we would need to have single use.
- 889 P2 Would it?
- 890 P5 Oh yes, definitely, yes. I think we can get away with it as a research tool, but not as a clinical  
891 tool, not any more. Everything that we have now is single person use. Everything we use in  
892 theatre, everything.
- 893 P1 So I suppose that ties into the costs as well, doesn't it?
- 894 P5 Yes.



## CF Expert Meeting

- 895 P2 And I think, looking at some of the ages of the children and their conversations in the  
896 interviews and things, they are very articulate and able to talk about these devices, and  
897 therefore in any future research we should make sure that it's not just research on children,  
898 it's research with, and alongside, and involve them in the design in terms of...When we went  
899 to the young person's forum, and they were great, and we made some changes to what we  
900 did based on that, and it'd be great to work...
- 901 P5 You should include that in the paper.
- 902 P2 Yes, we are, yes. But we did make some changes, and we fed that back to the group as to  
903 what changes were made, and I think this type of research is really important to get the  
904 children and young people's voice all the way through, and that's what would make it  
905 different, I feel, than just a research project, you know, research on the children. Because  
906 certainly, their level of literacy and understanding of their condition comes through, but also  
907 comparatively, they were very, very insight led. I've done interviews with lots of children and  
908 young people, and the level of detail and the conversation was very, very good, and that  
909 may be as a consequence of the way that they engaged generally, talking about their  
910 conditions anyway, but it provides us with that contextual insight. When we ask them, "So  
911 what were you doing at twenty past two on a Friday afternoon?", they're able to articulate  
912 that, because some of the interviews were quite lengthy really, weren't they?
- 913 P1 Yes.
- 914 P2 Which is great. It wasn't restrictive in any way, so they're quite unique in that sense.
- 915 P5 I think that probably merits highlighting as well.
- 916 P2 OK, yes.
- 917 P5 Because we've talked about what the differences are between this cohort we're looking at  
918 and children without CF. I think that's really important, they are pretty institutionalised.  
919 They're quite confident with adults because they meet adults, they meet the CF team on a  
920 regular basis. We will talk to them as individuals right from a very early age, and that's not  
921 normal really. You don't get, apart from talking to your teachers, children don't get much  
922 exposure to adults.
- 923 P2 Well, no, and we tend to work with children about activity interventions in focus groups  
924 because it's easier to get them to talk in groups. These were individual interviews, and the  
925 level of detail and depth around some of the answers was great, so that really is a strength,  
926 and something to capitalise on in future research.
- 927 P3 Another difference was that breathlessness aspect too, the perception that it was bad with  
928 the CF, whereas that might be very normal if you talk to youngsters without CF.
- 929 P4 It might just be a reflection of general low fixed levels of...
- 930 P5 It shouldn't be, really.

## CF Expert Meeting

931 P4 Well, it depends what we were doing, I guess.

932 P5 But are you saying more their perception that breathlessness...

933 P3 Is bad, and is part of the CF, so therefore, I think it was number six. Four. Unpleasant  
934 symptoms. Breathlessness hinders capability.

935 P5 So actually there that's quite a big culture shift. You need to be telling them that you need to  
936 be breathless from time to time.

937 P3 Everybody's out of breath.

938 P5 Everybody gets breathless.

939 P3 That's what we say to them when we do the exercise test. We are going to make you  
940 breathless, and that's the purpose of it. That's how they...

941 P5 And that's normal.

942 P3 And actually, you can stop a parent saying, "Stop!" Because they're seeing their child  
943 breathless, where we don't want them, we want to see how they cope with that, so...

944 P2 But parents of children at a normal activity whatever, multi-sports thing, would be saying the  
945 same. "Oh, he's looking a bit pink in the face. He's sweating a bit there. Perhaps you need to  
946 sit down and have a rest". That's typical parenting behaviour from somebody who's not got  
947 CF, and that's because of the way the parent understands the effects of physical activity,  
948 that that's ok, that's a normal healthy response, but they see it as being, "Oh, I don't want to  
949 see them sweating", and it's how they interpret it, so there could be some education around  
950 that as well.

951 P1 OK, so anybody got any more to add?

952 P5 Well, I think we could talk for ages, but I'm afraid I'm going to have to go, though. It's been  
953 very good.

954 P1 Yes. Brilliant.

955 P5 Where do we go from here?

956 P1 So could I just recap quickly the points that are raised, just to make sure I've not missed  
957 anything? So education from practitioner, parent, and also children and young person was  
958 highlighted, and it's important to look at the language used, testing versus monitoring, and  
959 make the distinction between the two. For example, looking at physical activity support  
960 package rather than testing, because that could be inferred as being judgemental. Feedback  
961 has again been highlighted as important, and supportive network, and again, looking at the  
962 principles, applying the principles to ensure that people progress, and looking at different  
963 ways that the feedback is offered, and also the roles of different people that may deliver  
964 that information doesn't necessarily have to be psychologist. It could be the physiotherapist,  
965 it could be somebody else. Also looking at the devices themselves, research tools versus

## CF Expert Meeting

966 commercial tools. Some of the issues regarding research tools with regards to they are  
967 reactive, you don't necessarily want that feedback, because then people will react to that  
968 and sort of spike the physical activity levels, but then there's the question about the validity  
969 of commercial tools. The sustainability of the tool in terms of avoiding reaching a ceiling with  
970 regards to young people and children's physical activity. That's a consideration. Also, from a  
971 clinical perspective, the importance of seven days' worth of data. There was a few issues  
972 highlighted there. It's an ideal opportunity to identify any patterns of physical activity, and  
973 also identify opportunities for intervention. Issues with compliance was raised, the  
974 difference that it may make to different age groups. Some compliance again, the types of  
975 prompts that are use to boost compliance, and also clinical barriers were highlighted, costs,  
976 time, resources, working in partnership with parents. It's not perceived to be just a clinical  
977 tool. It's perceived to be, again, engaging the family, and tailoring advice and information  
978 given, and although the team message was highlighted as being important with regards to  
979 who's best placed to facilitate the physical activity monitoring, physiotherapist seems to be  
980 quite well placed for this role. And again, with regards to cost, it has to be highlighted it  
981 would have to be single-use devices only. So again, that has a cost implication. Research  
982 points of interest kind of mirror quite a lot of the clinical ones, so cost and funding,  
983 compliance, in terms of use, the type of data that's produced, so research outcome versus  
984 user-friendly. Is it appropriate to use the same tools for research versus the type of role or  
985 the purpose for having monitoring. Is that the same as research needs? Involving children  
986 and young people in the research process, that was highlighted as very important, making  
987 sure that the young person's voice... but that crosses again very much into a clinical  
988 perspective also, because you always take that position anyway. Children and young people  
989 engage from the get go in their own health and their own health outcomes. Yes, and just  
990 capitalise on that really, in terms of research. That was about it. That was what I got. Is there  
991 anything else anybody wanted to add? No? OK. Thank you.

992 End of Meeting
